# Supplementary material
Source: MDPI journal article supplement (https://www.mdpi.com/2311-5637/9/11/985)
Supplement: s1 [file s1 › fermentation-2632369-supplementary.pdf]

**Purified acidic sophorolipid biosurfactants in skincare applications: an assessment of cytotoxic effects in comparison with synthetic surfactants using 3D in-vitro human skin model**

Simms A. Adu<sup>1</sup>, Matthew S. Twigg<sup>2</sup>, Patrick J. Naughton<sup>1</sup>, Roger Marchant<sup>2</sup> and Ibrahim M. Banat<sup>2\*</sup>

Supplementary figures

Figure S1

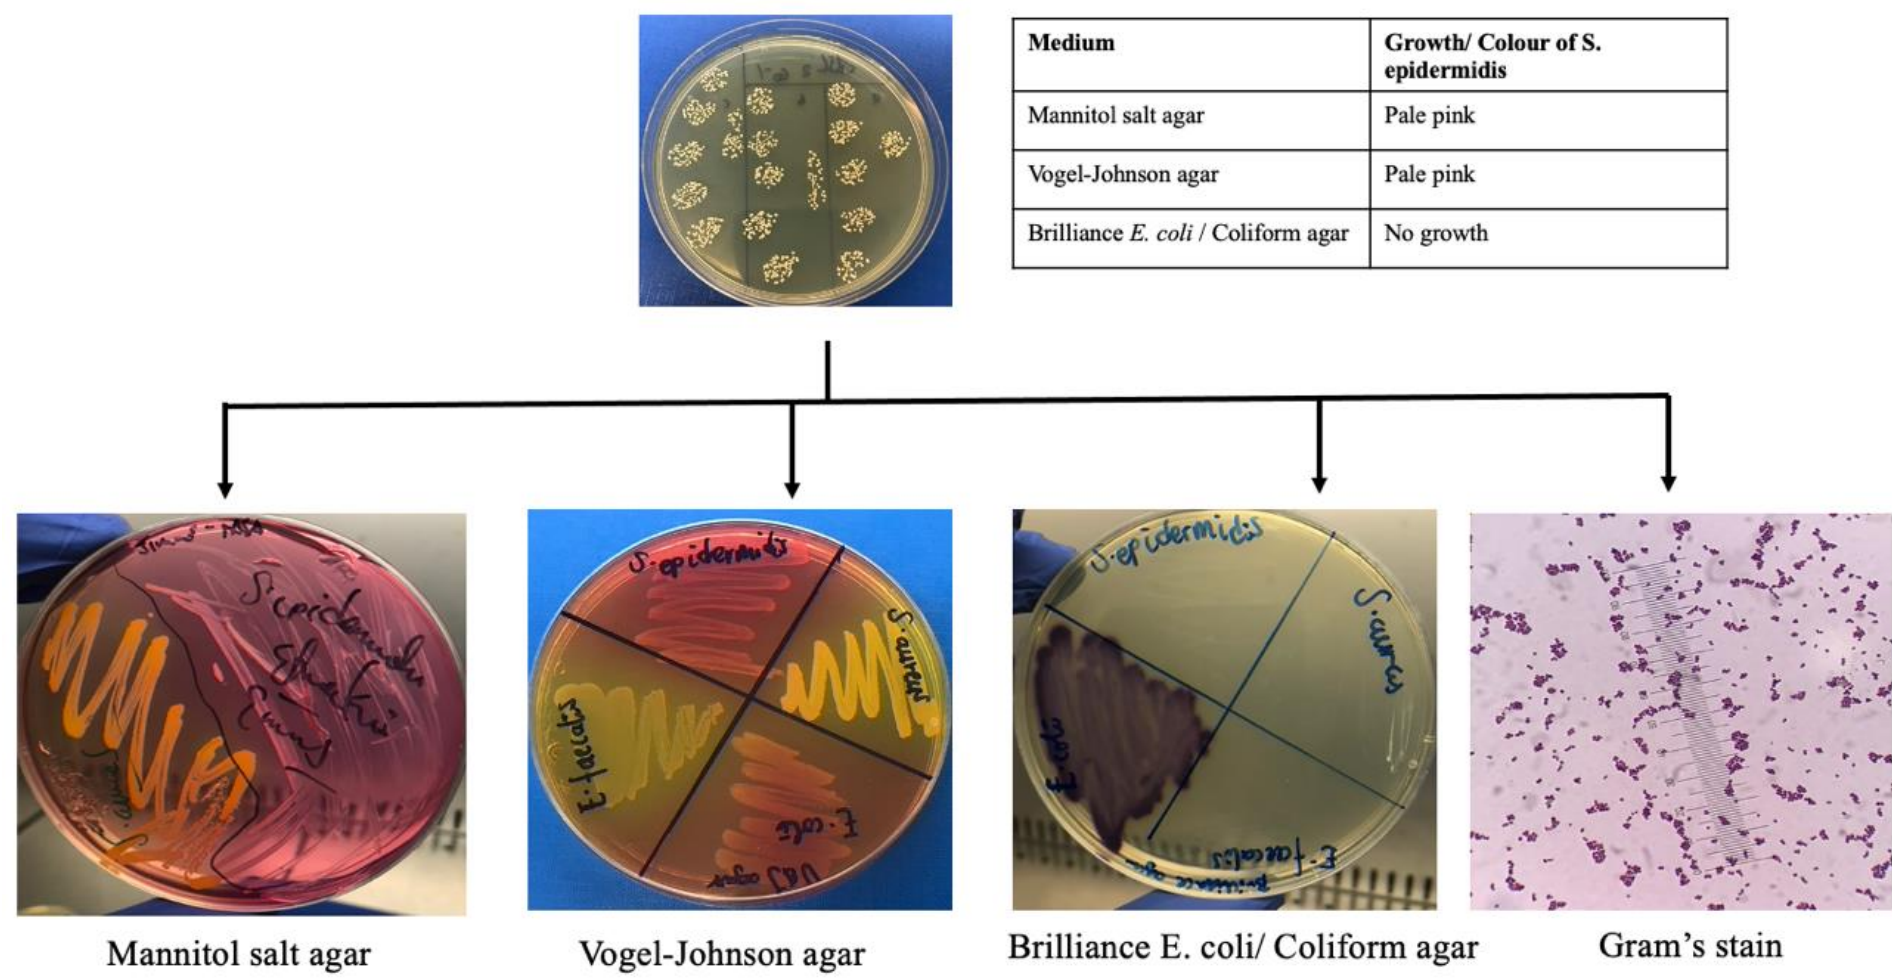

Figure S2

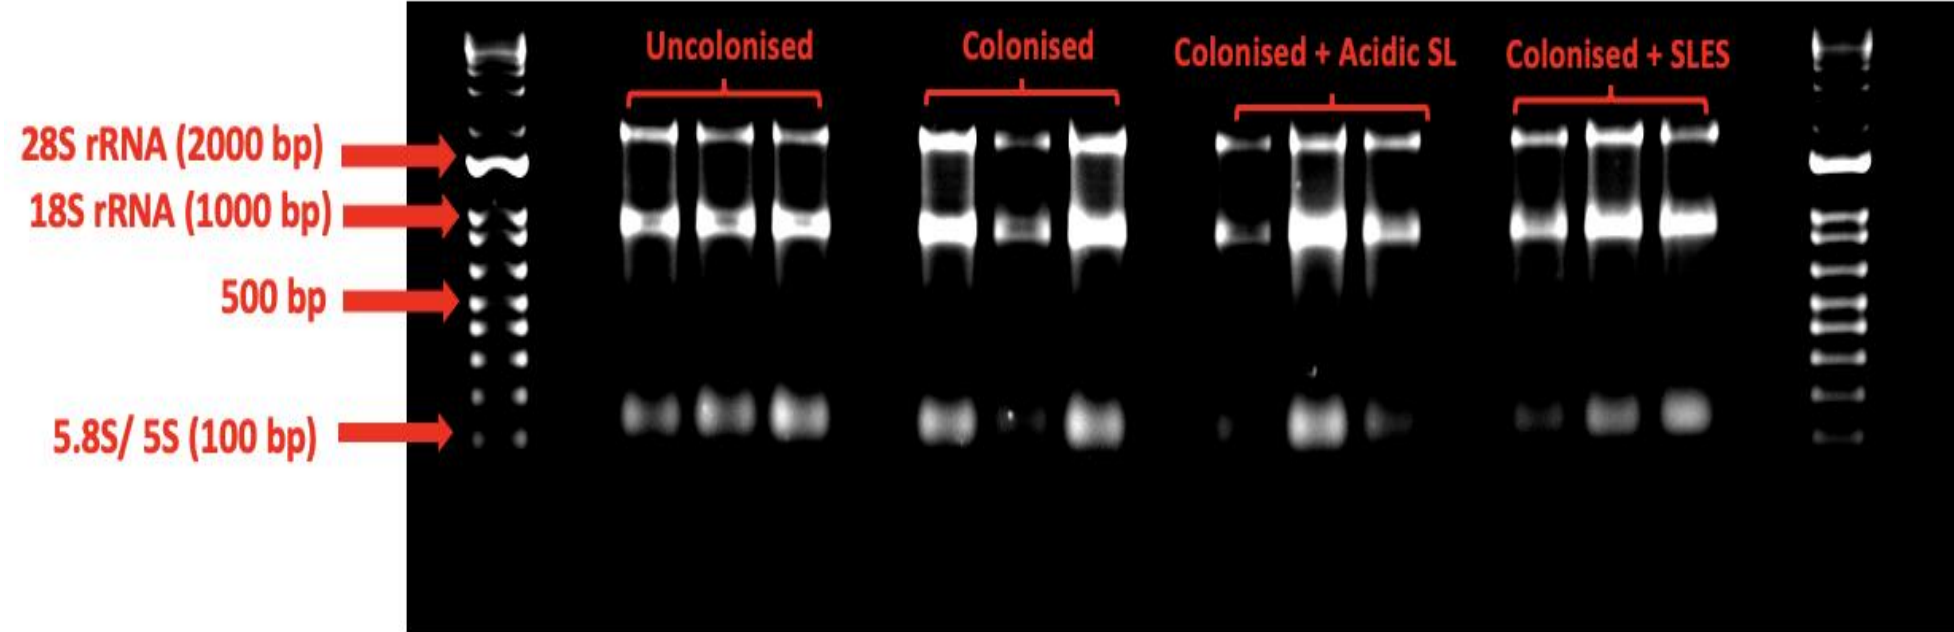

Figure S3

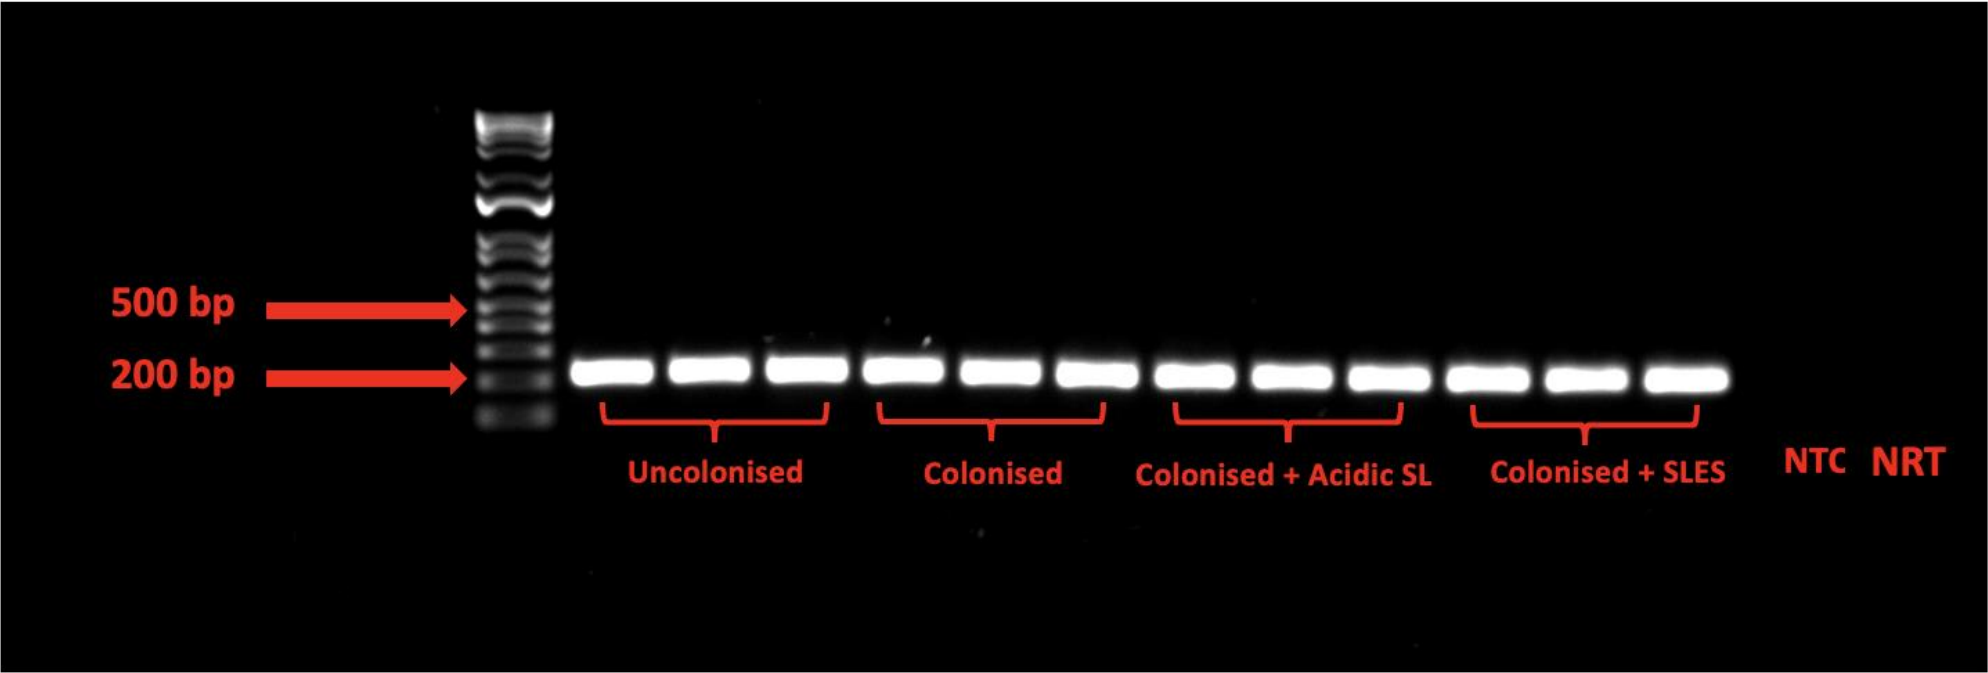

Figure S4

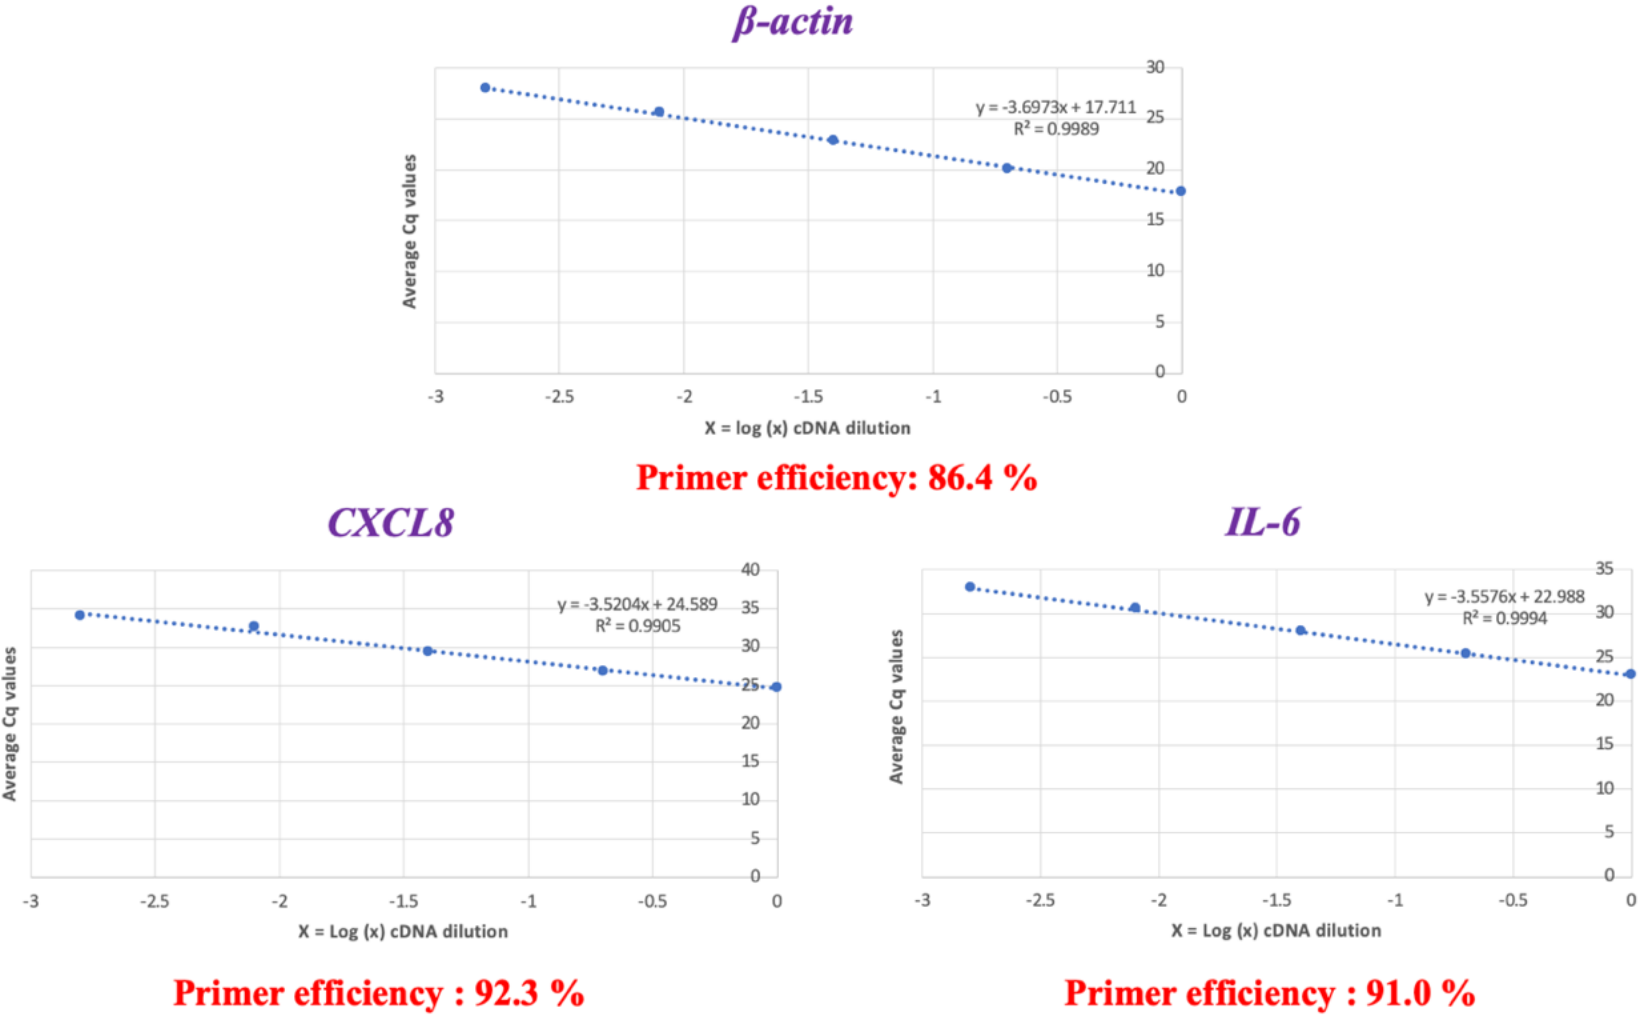

## Supplementary figure legends

### Figure S1

Phenotypic characterisation of sampled *S. epidermidis* colonised on Labskin™ surface using Gram's staining and differential/ selective media

### Figure S2

Gel electrophoretic analysis of total RNA extracted from Labskin™

### Figure S3

Gel electrophoretic analysis of cDNA synthesised from total RNA extracted from Labskin™. The amplicon size of all PCR products was approximately 200 bp, which corresponds to the expected amplicon size of the *B-actin* primer set designed for the qPCR as a reference gene. NRT and NTC represent Reverse Transcriptase minus and No Template negative control, respectively.

### Figure S4

Standard curves and primer efficiencies of primer sets utilised in qPCR analysis

## Supplementary tables

Table S1

| Primer         | Gene           | Sequence (5' – 3')              | Amplicon Length (bp) | Annealing Temperature (°C) |
|----------------|----------------|---------------------------------|----------------------|----------------------------|
| IL-8 SA-F      | <i>CXCL8</i>   | ACA CTG CGC CAA CAC AGA AA      | 117                  | 47                         |
| IL-8 SA-R      | <i>CXCL8</i>   | TTC TCA GCC CTC TTC AAA AAC TTC | 117                  | 49                         |
| IL-6 SA-F      | <i>IL-6</i>    | AGC CAG AGC TGT GCA GAT GA      | 110                  | 49                         |
| IL-6 SA-R      | <i>IL-6</i>    | GCA GGC TGG CAT TTG TGG TT      | 103                  | 51                         |
| B-actin EST- F | <i>B-actin</i> | CATCCGCAAAGACCTGTACG            | 200                  | 49                         |
| B- actin EST-R | <i>B-actin</i> | CCTGCTTGCTGATCCACATC            | 200                  | 49                         |

**Table S1**

Sequence of primer sets and product size of pro-inflammatory markers utilised in endpoint PCR and qPCR analyses. Primers were designed using the NCBI Primer-BLAST software and sequences of primers were
